# Supplementary material
Source: Springer Nature journal article supplement (https://www.springermedizin.de/resource/supplementary/12874_2007_257_MOESM1_ESM.pdf/9434096)
Supplement: MOESM1 [file 9434096]

**Online search:**

Records from PubMed (n=1188)

**Excluded by:**

Title or abstract

Excluded (n = 975)

Not drug intervention (n = 231)

Animal or in vitro studies (n = 13)

Not drug vs drug comparison (n = 536)

Not meta-analyses (n = 121)

Non-English language (n = 71)

Also author of this study (n = 3)

Full article

Excluded (n=174)

Not drug vs drug comparison (n=105)

Not meta-analysis (n=62)

Not drug intervention (n=5)

Duplets (n=2)

**Included:**

Meta-analyses (n=39)
